# Supplementary material for: Ni Nanoparticles Embedded Ti3C2Tx-MXene Nanoarchitectures for Electrochemical Sensing of Methylmalonic Acid
Source: Biosensors (Basel). 2022 Apr 10;12(4):231. doi: 10.3390/bios12040231 (PMC9030921; doi:10.3390/bios12040231)
Supplement: Supplementary file 1 [file biosensors-12-00231-s001.zip › biosensors-1651633-supplementary.pdf]

Supplementary Data

# Ni Nanoparticles Embedded $\text{Ti}_3\text{C}_2\text{T}_x$ -MXene Nanoarchitectures for Electrochemical Sensing of Methylmalonic Acid

Jai Kumar <sup>1</sup>, Razium Ali Soomro <sup>1,\*</sup>, Rana R. Neiber <sup>2,3</sup>, Nazeer Ahmed <sup>4</sup>, Shymaa S. Medany <sup>5</sup>, Munirah D. Albaqami <sup>6</sup> and Ayman Nafady <sup>6</sup>

- <sup>1</sup> State Key Laboratory of Organic-Inorganic Composites Beijing Key Laboratory of Electrochemical Process and Technology for Materials, Beijing University of Chemical Technology, Beijing 100029, China; 2020420024@mail.buct.edu.cn
  - <sup>2</sup> Beijing Key Laboratory of Ionic Liquids Clean Process, CAS Key Laboratory of Green Process, and Engineering, Institute of Process Engineering, Chinese Academy of Sciences, Beijing 100190, China; rana@ipe.ac.cn
  - <sup>3</sup> College of Chemical Engineering, University of Chinese Academy of Sciences, 19 A Yuquan Road, Beijing 100049, China
  - <sup>4</sup> Research Center on Nanotechnology Applied to Engineering of Sapienza (CNIS), Sapienza University of Rome, P. le Aldo Moro 5, 00185, Rome, Italy; ahmed.1875130@studenti.uniroma1.it
  - <sup>5</sup> Department of Chemistry, Faculty of Science, Cairo University, Cairo, Giza 12613, Egypt; shymaaamir80@cu.edu.eg
  - <sup>6</sup> Department of Chemistry, College of Science, King Saud University, P.O. Box 2455, Riyadh 11451, Saudi Arabia; muneerad@ksu.edu.sa (M.D.A.); anafady@ksu.edu.sa (A.N.)
- \* Correspondence: 2021700008@mail.buct.edu.cn; Tel.: +86-178-0101-4094

**Citation:** Kumar, J.; Soomro, R.A.; Neiber, R.R.; Ahmed, N.; Medany, S.S.; Albaqami, M.D.; Nafady, A. Ni nanoparticles Embedded  $\text{Ti}_3\text{C}_2\text{T}_x$ -MXene Nanoarchitectures for Electrochemical Sensing of Methylmalonic Acid. *Biosensors* **2022**, *12*, 231. <https://doi.org/10.3390/bios12040231>

Received: 9 March 2022

Accepted: 8 April 2022

Published: 10 April 2022

**Publisher's Note:** MDPI stays neutral with regard to jurisdictional claims in published maps and institutional affiliations.

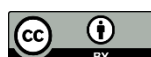

**Copyright:** © 2022 by the authors. Submitted for possible open access publication under the terms and conditions of the Creative Commons Attribution (CC BY) license (<https://creativecommons.org/licenses/by/4.0/>).

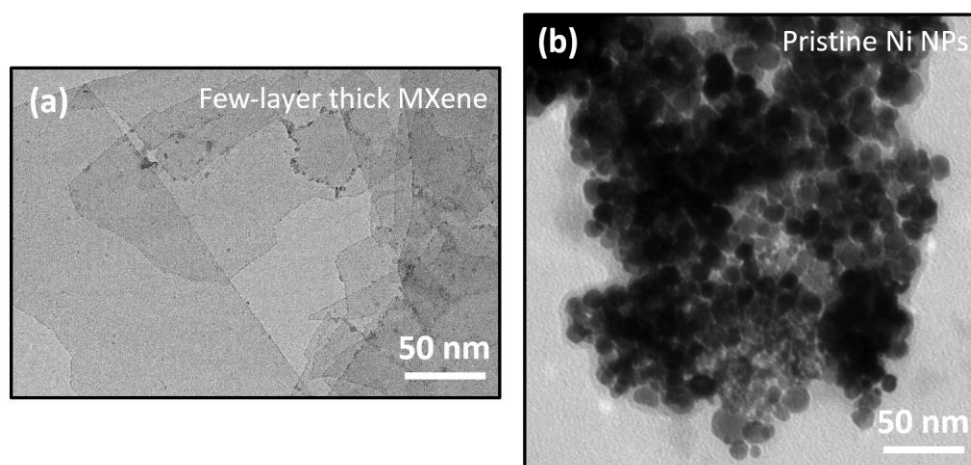

**Figure S1.** TEM images of (a) few-layer thick MXenes; (b) pristine Ni NPs.

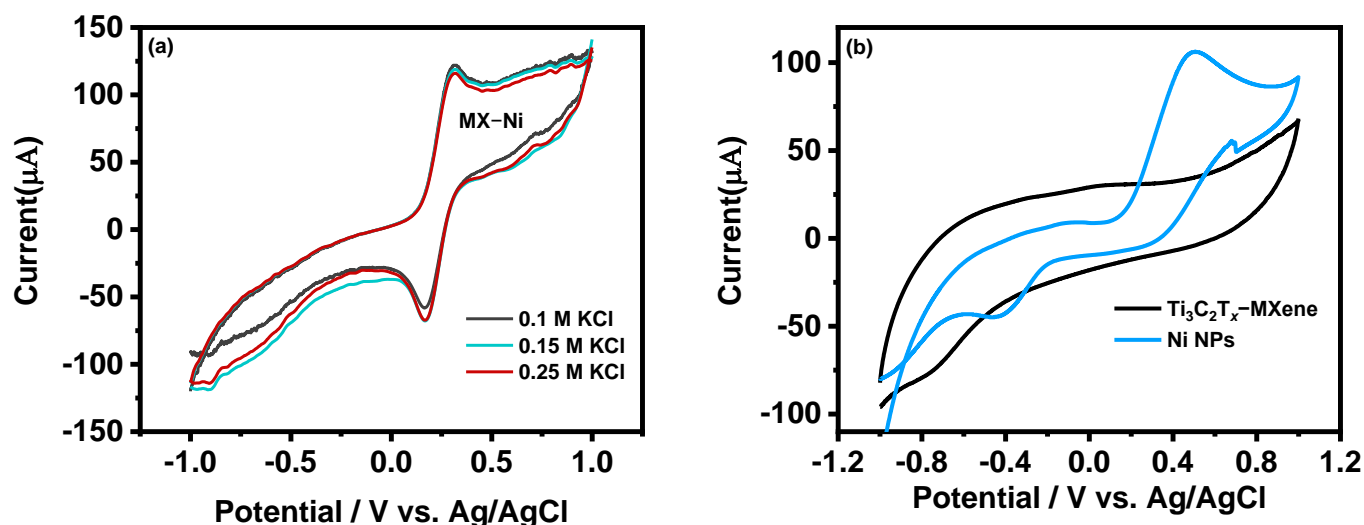

**Figure S2.** (a) CV curve for MX-Ni composite recorded in 0.5 mM of  $K_4[Fe(CN)_6]/K_3[Fe(CN)_6]$  with variable in ionic strength of neutral supporting electrolyte KCl from 0.1 to 0.25 M; (b) CV profiles of pristine Ni NPs and  $Ti_3C_2T_x$  modified GCE in 0.1 M PBS (pH 7.0) at scan rate of 50  $mVs^{-1}$ .

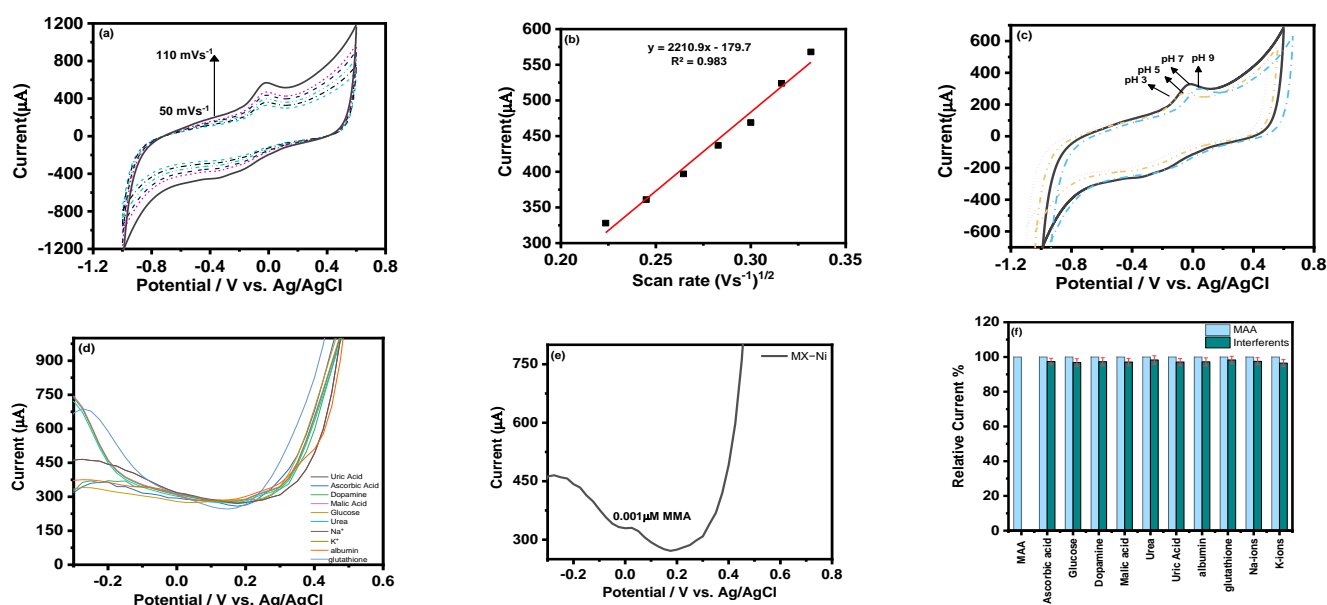

**Figure S3.** (a) CV profile of MX-Ni composites at different scan rates from 50 to 110  $mVs^{-1}$  against a fixed concentration of MMA; (b) corresponding plot for current intensity against the square of scan rate confirming the surface-redox process to be diffusion controlled; (c) the variation of MX-Ni response against different pH from 3 to 9 showing optimum MMA response at biological pH of 7; (d) the DPV response of MX-Ni electrode for different interferents without MMA; (e) the corresponding DPV response against 0.001  $\mu M$  of MMA; (f) the variation in DPV current response of MX-Ni electrode for MMA (0.001  $\mu M$ ) in the presence of interferents such as ascorbic acid (20  $\mu M$ ), glucose (7 mM), dopamine (0.065 mM), malic acid (2  $\mu M$ ), urea (50 mM), uric acid (0.4 mM), albumin (10  $\mu M$ ), glutathione (1 mM) and cations such as  $Na^+$  (130 mM) and  $K^+$  ions (5 mM).
